# Supplementary material
Source: PubMed Central journal article supplement (PMC4159747)
Supplement: NIHMS616634-supplement-supplement_1.pdf [file NIHMS616634-supplement-supplement_1.pdf]

**Supplementary Table 1.** Per-allele OR and 95% CIs for the association of established cancer susceptibility loci and breast cancer risk overall in PBCS

| Locus (Neighborhood genes)     | rs number                    | MAF <sup>a</sup> | Controls, N | Cases, N | OR (95% CI) <sup>b</sup> | P        | Reference <sup>c</sup>         |
|--------------------------------|------------------------------|------------------|-------------|----------|--------------------------|----------|--------------------------------|
| 10q26 (FGFR2)                  | rs2981582 (C/T) <sup>d</sup> | 0.353            | 2249        | 1698     | 1.29 (1.18-1.41)         | 1.28E-08 | Easton DF, 2007 <sup>1</sup>   |
| 11q13 (ORAOV1)                 | rs614367 (G/A)               | 0.195            | 2174        | 1639     | 1.24 (1.12-1.37)         | 3.95E-05 | Turnbull C, 2010 <sup>2</sup>  |
| 10q21.2 (ZNF365)               | rs10995190 (G/A)             | 0.207            | 2173        | 1633     | 0.79 (0.71-0.89)         | 5.92E-05 | Turnbull C, 2010 <sup>2</sup>  |
| 2q35 (TNP1/IGFBP5/IGFBP2/TNS1) | rs13387042 (T/C)             | 0.446            | 2324        | 1850     | 0.86 (0.79-0.93)         | 3.16E-04 | Stacey SN, 2007 <sup>3</sup>   |
| 8q24 (FAM84B/c-MYC/POU5F1P1)   | rs13281615 (A/G)             | 0.459            | 2339        | 1860     | 1.13 (1.04-1.23)         | 0.005    | Easton DF, 2007 <sup>1</sup>   |
| 1p11.2 (NOTCH2/FCGR1B)         | rs11249433 (A/G)             | 0.369            | 2340        | 1856     | 1.12 (1.03-1.22)         | 0.007    | Thomas G, 2009 <sup>4</sup>    |
| 6q25.1 (ESR1)                  | rs2046210 (G/A)              | 0.294            | 2291        | 1770     | 1.13 (1.03-1.24)         | 0.01     | Zheng W, 2009 <sup>5</sup>     |
| 5p12 (MRPS30/FGFR10)           | rs10941679 (A/G)             | 0.259            | 2366        | 1885     | 1.13 (1.03-1.24)         | 0.01     | Stacey SN, 2008 <sup>6</sup>   |
| 9p21 (CDKN2B)                  | rs1011970 (G/T)              | 0.128            | 2163        | 1637     | 1.17 (1.03-1.33)         | 0.01     | Turnbull C, 2010 <sup>2</sup>  |
| 14q24.1 (RAD51L1)              | rs10483813 (T/A)             | 0.239            | 2362        | 1878     | 0.90 (0.82-0.99)         | 0.04     | Thomas G, 2009 <sup>4</sup>    |
| 5p12 (MRPS30/FGFR10)           | rs4415084 (C/T)              | 0.421            | 2232        | 1751     | 1.09 (1.00-1.18)         | 0.05     | Stacey SN, 2008 <sup>6</sup>   |
| 11p15 (LSP1)                   | rs3817198 (T/C)              | 0.324            | 2349        | 1863     | 1.07 (0.98-1.17)         | 0.13     | Easton DF, 2007 <sup>1</sup>   |
| 5q11 (MAP3K1)                  | rs889312 (A/C)               | 0.261            | 2285        | 1775     | 1.07 (0.98-1.18)         | 0.14     | Easton DF, 2007 <sup>1</sup>   |
| 10q22.3 (ZMIZ1)                | rs704010 (C/T)               | 0.330            | 2151        | 1631     | 1.07 (0.98-1.17)         | 0.16     | Turnbull C, 2010 <sup>2</sup>  |
| 17q23 (COX11)                  | rs6504950 (G/A)              | 0.259            | 2361        | 1878     | 0.94 (0.85-1.03)         | 0.16     | Ahmed S, 2009 <sup>7</sup>     |
| 19p13.1 (C19orf62)             | rs8170 (G/A)                 | 0.208            | 2156        | 1639     | 1.02 (0.92-1.14)         | 0.71     | Antoniou AC, 2010 <sup>8</sup> |
| 10p15 (ANKRD16)                | rs2380205 (G/A)              | 0.478            | 2185        | 1643     | 0.99 (0.9-1.07)          | 0.75     | Turnbull C, 2010 <sup>2</sup>  |
| 3p24 (NEK10/SLC4A7)            | rs4973768 (G/A)              | 0.490            | 2269        | 1767     | 1.00 (0.92-1.09)         | 0.97     | Ahmed S, 2009 <sup>7</sup>     |

<sup>a</sup>Minor allele frequency over all controls in PBCS. <sup>b</sup>ORs estimated from logistic regression models adjusted for age in 5-year categories and study site. ORs for each SNP are for the minor allele. <sup>c</sup>Reference for manuscript in which SNP was first identified. <sup>d</sup>Major/minor allele.

**Supplementary Table 2.** Per-allele OR and 95% CI for the association of established cancer susceptibility loci and breast cancer risk by E-cadherin tumor expression in PBCS

| Locus (Gene)                   | rs number                    | Controls, N | N   | Case-control analyses |      | Case-only        | P-het <sup>a</sup> |
|--------------------------------|------------------------------|-------------|-----|-----------------------|------|------------------|--------------------|
|                                |                              |             |     | OR (95% CI)           | N    | OR (95% CI)      |                    |
| 6q25.1 (ESR1)                  | rs2046210 (G/A) <sup>b</sup> | 2291        | 239 | 1.43 (1.18-1.75)      | 949  | 1.06 (0.94-1.19) | 0.007              |
| 1p11.2 (NOTCH2/FCGR1B)         | rs11249433 (A/G)             | 2340        | 250 | 1.30 (1.08-1.56)      | 989  | 1.06 (0.95-1.18) | 0.05               |
| 10p15 (ANKRD16)                | rs2380205 (G/A)              | 2185        | 215 | 0.85 (0.70-1.04)      | 881  | 1.03 (0.93-1.16) | 0.06               |
| 10q22.3 (ZMIZ1)                | rs704010 (C/T)               | 2151        | 216 | 0.88 (0.71-1.09)      | 880  | 1.08 (0.96-1.21) | 0.06               |
| 10q26 (FGFR2)                  | rs2981582 (C/T)              | 2249        | 228 | 1.09 (0.89-1.33)      | 918  | 1.26 (1.13-1.42) | 0.14               |
| 19p13.1 (C19orf62)             | rs8170 (G/A)                 | 2156        | 216 | 1.17 (0.92-1.50)      | 884  | 1.03 (0.89-1.18) | 0.28               |
| 11q13 (ORAOV1)                 | rs614367 (G/A)               | 2174        | 215 | 1.40 (1.12-1.74)      | 881  | 1.30 (1.14-1.47) | 0.53               |
| 9p21 (CDKN2B)                  | rs1011970 (G/T)              | 2163        | 216 | 1.37 (1.05-1.79)      | 881  | 1.12 (0.95-1.31) | 0.14               |
| 2q35 (TNP1/IGFBP5/IGFBP2/TNS1) | rs13387042 (T/C)             | 2324        | 246 | 0.78 (0.64-0.94)      | 997  | 0.88 (0.79-0.97) | 0.24               |
| 5q11 (MAP3K1)                  | rs889312 (A/C)               | 2285        | 237 | 1.09 (0.88-1.36)      | 955  | 1.03 (0.91-1.17) | 0.70               |
| 11p15 (LSP1)                   | rs3817198 (T/C)              | 2349        | 248 | 1.02 (0.84-1.25)      | 999  | 1.06 (0.95-1.19) | 0.86               |
| 10q21.2 (ZNF365)               | rs10995190 (G/A)             | 2173        | 212 | 0.75 (0.57-0.98)      | 876  | 0.83 (0.72-0.96) | 0.51               |
| 17q23 (COX11)                  | rs6504950 (G/A)              | 2361        | 248 | 0.89 (0.72-1.10)      | 1010 | 0.93 (0.83-1.05) | 0.71               |
| 5p12 (MRPS30/FGFR10)           | rs4415084 (C/T)              | 2232        | 233 | 1.07 (0.88-1.29)      | 945  | 1.07 (0.96-1.20) | 0.91               |
| 5p12 (MRPS30/FGFR10)           | rs10941679 (A/G)             | 2366        | 251 | 1.06 (0.86-1.30)      | 1012 | 1.11 (0.99-1.25) | 0.60               |
| 8q24 (FAM84B/c-MYC/POU5F1P1)   | rs13281615 (A/G)             | 2339        | 248 | 1.06 (0.88-1.28)      | 1000 | 1.09 (0.98-1.21) | 0.70               |
| 14q24.1 (RAD51L1)              | rs10483813 (T/A)             | 2362        | 251 | 0.84 (0.67-1.06)      | 1007 | 0.90 (0.79-1.02) | 0.62               |
| 3p24 (NEK10/SLC4A7)            | rs4973768 (G/A)              | 2269        | 237 | 1.01 (0.83-1.21)      | 951  | 1.02 (0.92-1.14) | 0.98               |

<sup>a</sup>Case-only P-value was used to test for heterogeneity (Phet) and was estimated using a polytomous logistic regression model with E-cadherin (E-cad) status as the outcome adjusted for age in 5-year categories. <sup>b</sup>Major/minor allele.

**Supplementary Table 3.** Distribution of select clinicopathologic features among breast cancer cases by E-cadherin tumor tissue expression levels in PBCS and SEARCH

| Characteristics                  | PBCS                 |                        |                  | SEARCH               |                        |                  |
|----------------------------------|----------------------|------------------------|------------------|----------------------|------------------------|------------------|
|                                  | E-cad low<br>(N=267) | E-cad high<br>(N=1080) | P-value          | E-cad low<br>(N=471) | E-cad high<br>(N=1535) | P-value          |
| Histology, n (%)                 |                      |                        |                  |                      |                        |                  |
| Ductal                           | 76 (28.5)            | 677 (62.7)             | <b>&lt;0.001</b> | 241 (51.2)           | 1291 (84.2)            | <b>&lt;0.001</b> |
| Lobular                          | 132 (49.4)           | 110 (10.2)             |                  | 179 (38.0)           | 124 (8.0)              |                  |
| Other                            | 59 (22.1)            | 292 (27.0)             |                  | 51 (10.8)            | 119 (7.8)              |                  |
| Grade, n (%)                     |                      |                        |                  |                      |                        |                  |
| Well/Moderately differentiated   | 209 (80.1)           | 780 (73.7)             | <b>0.03</b>      | 271 (70.0)           | 978 (69.8)             | 0.93             |
| Poorly differentiated            | 52 (19.9)            | 278 (26.3)             |                  | 116 (30.0)           | 423 (30.2)             |                  |
| Tumor size (cm), n (%)           |                      |                        |                  |                      |                        |                  |
| ≤2                               | 119 (45.1)           | 571 (53.7)             | <b>0.01</b>      | 140 (59.6)           | 539 (66.8)             | <b>0.04</b>      |
| >2                               | 145 (54.9)           | 492 (46.3)             |                  | 95 (40.4)            | 268 (33.2)             |                  |
| Axillary node involvement, n (%) |                      |                        |                  |                      |                        |                  |
| Negative                         | 150 (58.4)           | 622 (59.0)             | 0.85             | 141 (59.8)           | 471 (60.0)             | 0.94             |
| Positive                         | 107 (41.6)           | 432 (41.0)             |                  | 95 (40.2)            | 314 (40.0)             |                  |
| ER status, n (%)                 |                      |                        |                  |                      |                        |                  |
| Negative                         | 93 (36.2)            | 307 (29.8)             | 0.05             | 85 (20.0)            | 344 (25.2)             | <b>0.03</b>      |
| Positive                         | 164 (63.8)           | 724 (70.2)             |                  | 341 (80.0)           | 1022 (74.8)            |                  |

P-values were calculated using the chi-squared test. Abbreviations: E-cad, E-cadherin; ER, estrogen receptor.
